# Supplementary material
Source: Royal Society of Chemistry journal article supplement (doi:10.1039/d6tc00368k)
Supplement: d6tc00368k1.pdf [file d6tc00368k1.pdf]

## Supplementary Information

### Isomeric Engineering of Dithieno[3,2-*b*:2',3'-*d*]thiophene Derivatives for Efficient Deep-Blue OLEDs

Yawen Hou,<sup>‡a</sup> Chenfa Xiao,<sup>‡b</sup> Ruofeng Xu,<sup>a</sup> Yujiao Hou,<sup>a</sup> Hao Cheng,<sup>a</sup> Bin Chen,<sup>\*a</sup> and Han Zhang<sup>\*c</sup>

<sup>a</sup> School of Material Science and Chemical Engineering, Ningbo University, Ningbo, Zhejiang, 315211, China.

<sup>b</sup> State Key Laboratory of Luminescent Materials and Devices, Guangdong Provincial Key Laboratory of Luminescence from Molecular Aggregates, South China University of Technology, Guangzhou 510640, China.

<sup>c</sup> Department of Chemistry and the Hong Kong Branch of Chinese National Engineering Research Center for Tissue Restoration and Reconstruction, The Hong Kong University of Science and Technology, Clear Water Bay, Kowloon, Hong Kong 999077, China.

\*Correspondence should be sent to: chenbin2@nbu.edu.cn; cheungham@ust.hk

## 1. Materials and Instruments

All other chemicals and reagents were purchased from commercial sources and used as received without further purification.  $^1\text{H}$  and  $^{13}\text{C}$  NMR spectra were examined using a Bruker ARX 500 NMR spectrometer. The solvent utilized was dichloromethane- $d_2$  and deuterated chloroform, with tetramethylsilane (TMS;  $\delta = 0$  ppm) serving as the internal reference. High-resolution mass spectra (HRMS) were subjected to analysis using a time-of-flight mass spectrometer (TIMS-TOF) from Bruker Daltonik, with the obtained data reported as  $m/z$  (relative intensity). UV-vis spectrum was obtained by PerkinElmer Lambda 365 Spectrophotometer. Fluorescence spectrum was acquired using FluoroMax-4 Spectrophotometer. The quantum yield (QY) was determined using a QE-2100 (Otsuka Electronics) device for measuring quantum efficiency, with a 150 W xenon lamp as the source of excitation. The fluorescent life time was measured Horiba fluorescence spectrometer FL3-111. Thermal gravity analysis (TGA) was performed on a Perkin-Elmer thermal analysis system from 30 °C to 600 °C at a heating rate of 10 °C·min $^{-1}$  at a nitrogen flow rate of 20 mL·min $^{-1}$ . Differential scanning calorimeter (DSC) analysis was carried out by a Mettler Toledo-DSC 3+ from 25 °C to 250 °C / 290 °C / 330 °C at a heating rate of 10 °C·min $^{-1}$  under a nitrogen flow.

## 2. Synthesis and Characterization

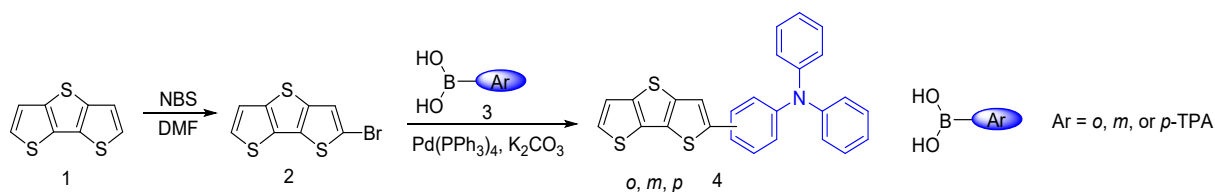

**Scheme S1.** Synthetic routes of TPA-DTTs.

Compound 2 was synthesized according to reported in literature.<sup>1</sup> TPA-DTTs were synthesized through Suzuki-Miyaura coupling reaction.<sup>2</sup> The detailed synthetic procedure was described as follows.

### 4-(dithieno [3,2-*b*:2',3'-*d*] thiophen-2-yl)-N, N-diphenylaniline (*p*-TPA-DTT)

To a two-necked flask were added 2-bromodithieno[3,2-*b*:2',3'-*d*] thiophene (0.20 g, 0.72 mmol), 4-(diphenylamino) benzeneboronic acid (0.32 g, 0.87 mmol),  $\text{K}_2\text{CO}_3$  (0.20 g, 1.45 mmol) and  $\text{Pd}(\text{PPh}_3)_4$  (0.084 g, 0.072 mmol) to make a reaction mixture. Subsequently, a solution of 20ml of a mixture of toluene, anhydrous ethanol and water (8:1:1, v/v/v) was added under an inert atmosphere. The reaction was conducted at 110°C under a nitrogen atmosphere for 8 h. After the reaction, the mixture was poured into brine and extracted twice with dichloromethane. The organic layers were dried by anhydrous magnesium sulfate. After filtration, the solvent was evaporated under reduced pressure and the residue purified by silica-

gel column chromatography using PE/DCM mixture (5:1, v/v) as eluent. Obtaining a cyan solid of *p*-TPA-DTT in 73% yield. <sup>1</sup>H NMR (500MHz, Chloroform-*d*), δ (ppm): 7.52 – 7.47 (m, 2H), 7.41 (s, 1H), 7.35 (d, *J* = 5.3 Hz, 1H), 7.32 – 7.25 (m, 5H), 7.17 – 7.12 (m, 4H), 7.12 – 7.03 (m, 4H). <sup>13</sup>C NMR (125MHz, Chloroform-*d*), δ (ppm): 147.62, 147.35, 144.93, 142.21, 140.76, 131.18, 129.36, 128.31, 126.47, 125.67, 124.67, 123.45, 123.28, 120.72, 115.52. HRMS (C<sub>26</sub>H<sub>17</sub>NS<sub>3</sub><sup>+</sup>): *m/z* 439.0510 (M<sup>+</sup>: calcd 439.0523).

### **3-(dithieno [3,2-*b*:2',3'-*d*] thiophen-2-yl)-N, N-diphenylaniline (*m*-TPA-DTT)**

The procedure was analogous to that described for *p*-TPA-DTT. Obtaining a white solid of *m*-TPA-DTT in 67% yield. <sup>1</sup>H NMR (500MHz, Methylene Chloride-*d*<sub>2</sub>), δ (ppm): 7.42 (s, 1H), 7.39 (d, *J* = 5.2 Hz, 1H), 7.35 (q, *J* = 1.3 Hz, 1H), 7.32 – 7.25 (m, 7H), 7.16 – 7.11 (m, 4H), 7.06 (tt, *J* = 7.4, 1.2 Hz, 2H), 6.99 (ddd, *J* = 6.0, 3.3, 2.3 Hz, 1H). <sup>13</sup>C NMR (125MHz, Methylene Chloride-*d*<sub>2</sub>), δ (ppm): 149.07, 147.94, 145.01, 142.53, 141.68, 135.82, 131.39, 130.29, 130.27, 129.75, 126.64, 124.94, 123.60, 123.37, 121.16, 120.82, 120.01, 117.15. HRMS (C<sub>26</sub>H<sub>17</sub>NS<sub>3</sub><sup>+</sup>): *m/z* 439.0509 (M<sup>+</sup>: calcd 439.0523).

### **2-(dithieno [3,2-*b*:2',3'-*d*] thiophen-2-yl)-N, N-diphenylaniline (*o*-TPA-DTT)**

The procedure was analogous to that described for *p*-TPA-DTT. Obtaining a white solid of *o*-TPA-DTT in 54% yield. <sup>1</sup>H NMR (500MHz, Methylene Chloride-*d*<sub>2</sub>), δ (ppm): 7.71 (dd, *J* = 7.4, 2.0 Hz, 1H), 7.42 – 7.31 (m, 4H), 7.26 (d, *J* = 5.2 Hz, 1H), 7.22 (dd, *J* = 7.5, 1.8 Hz, 1H), 7.16 (t, *J* = 7.9Hz, 4H), 7.05 – 6.97 (m, 4H), 6.90 (t, *J* = 7.4 Hz, 2H). <sup>13</sup>C NMR (125MHz, Methylene Chloride-*d*<sub>2</sub>), δ (ppm): 147.74, 144.36, 141.56, 141.42, 141.13, 133.59, 131.51, 131.48, 131.32, 130.96, 129.90, 129.25, 126.97, 126.45, 122.34, 121.06, 119.56. HRMS (C<sub>26</sub>H<sub>17</sub>NS<sub>3</sub><sup>+</sup>): *m/z* 439.0508 (M<sup>+</sup>: calcd 439.0523).

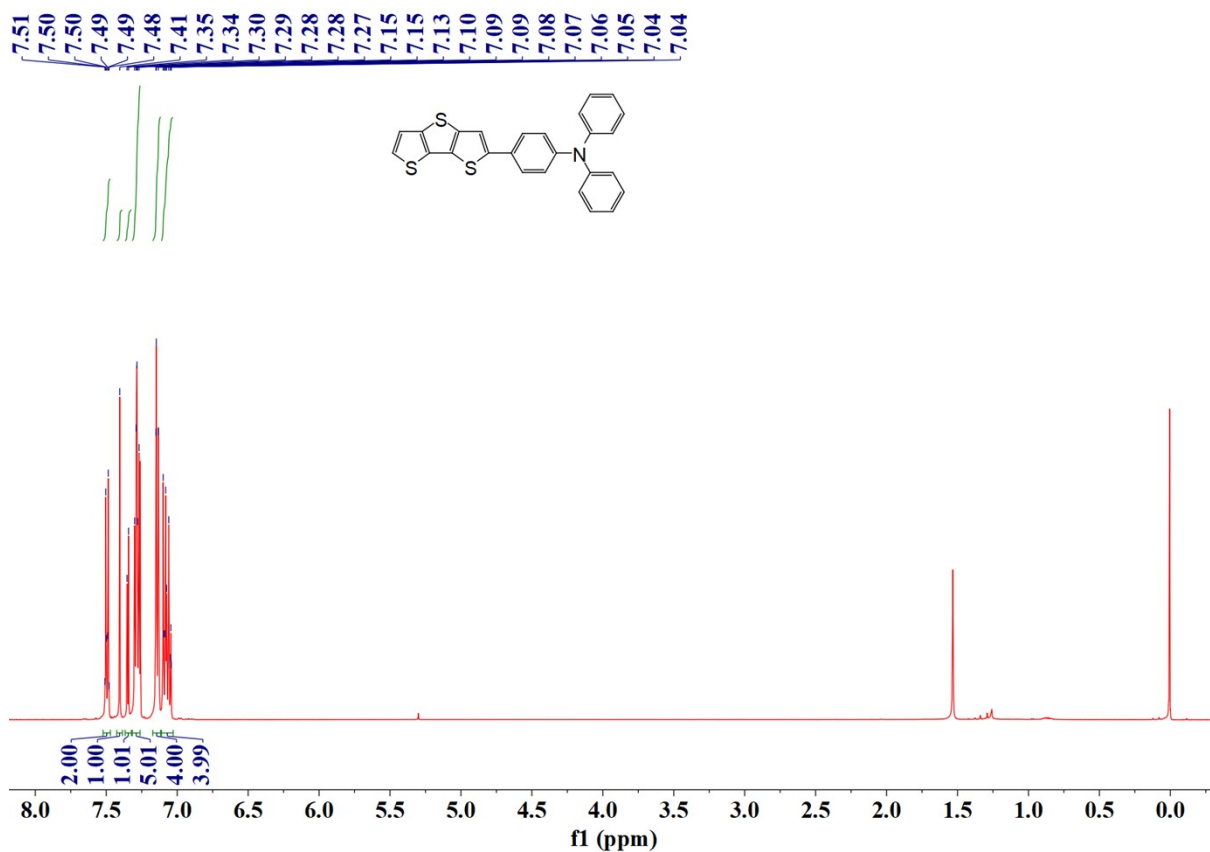

**Figure S1.** <sup>1</sup>H NMR spectrum of *p*-TPA-DTT measured in CDCl<sub>3</sub>.

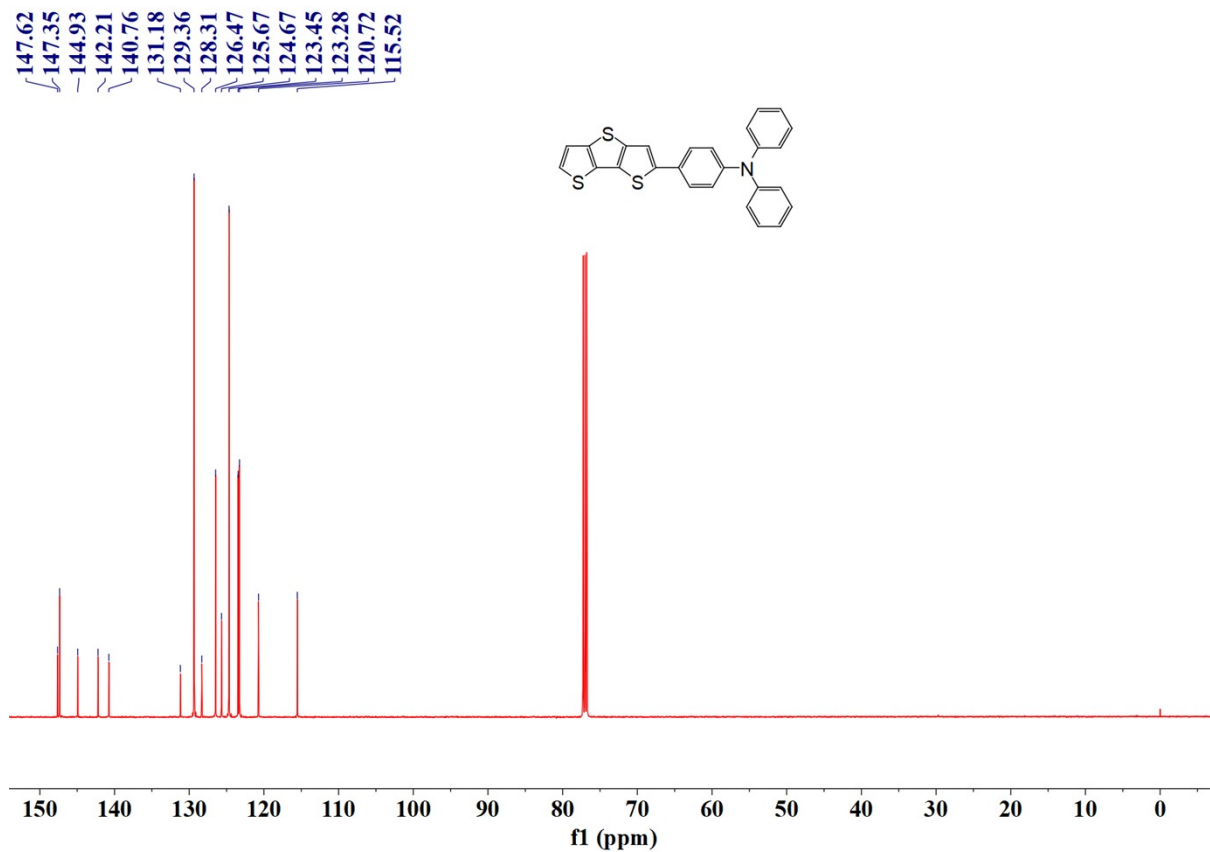

**Figure S2.** <sup>13</sup>C NMR spectrum of *p*-TPA-DTT measured in CDCl<sub>3</sub>.

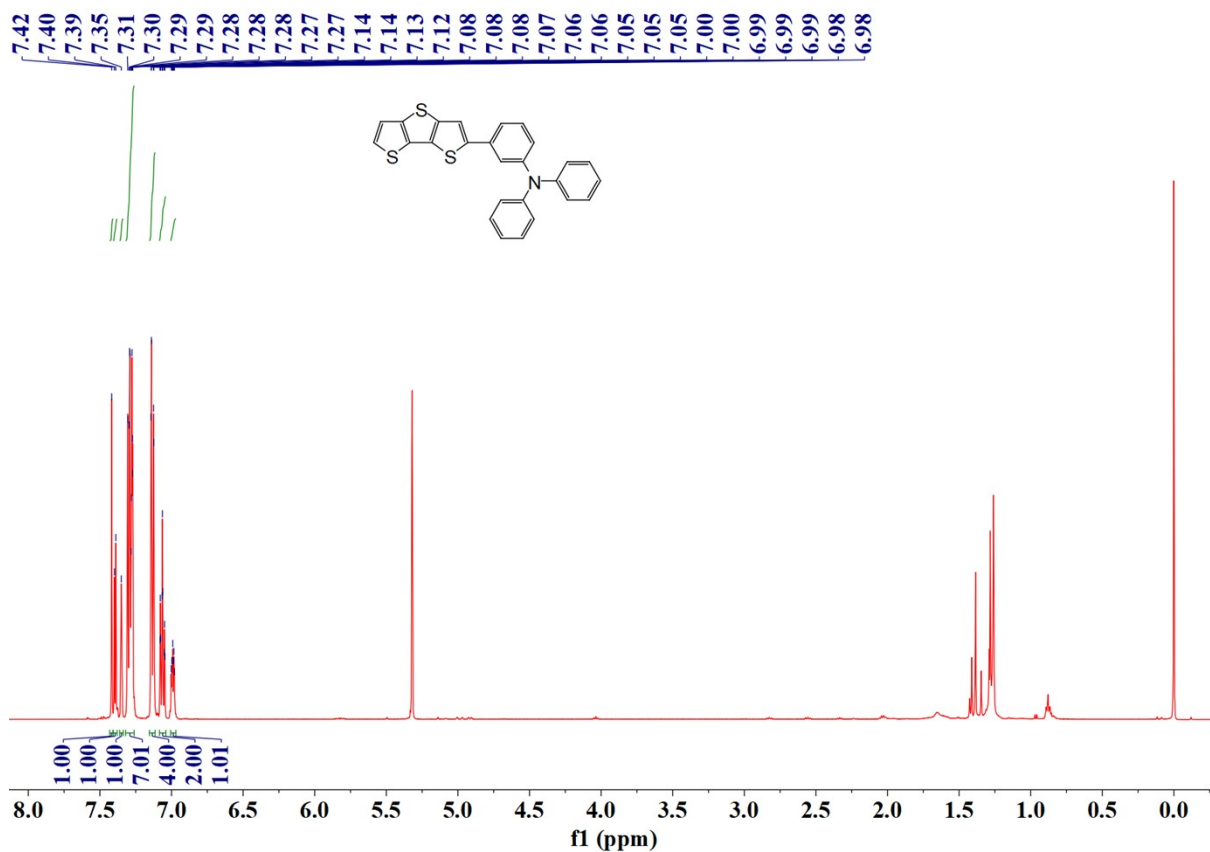

**Figure S3.**  $^1\text{H}$  NMR spectrum of *m*-TPA-DTT measured in  $\text{CD}_2\text{Cl}_2$ .

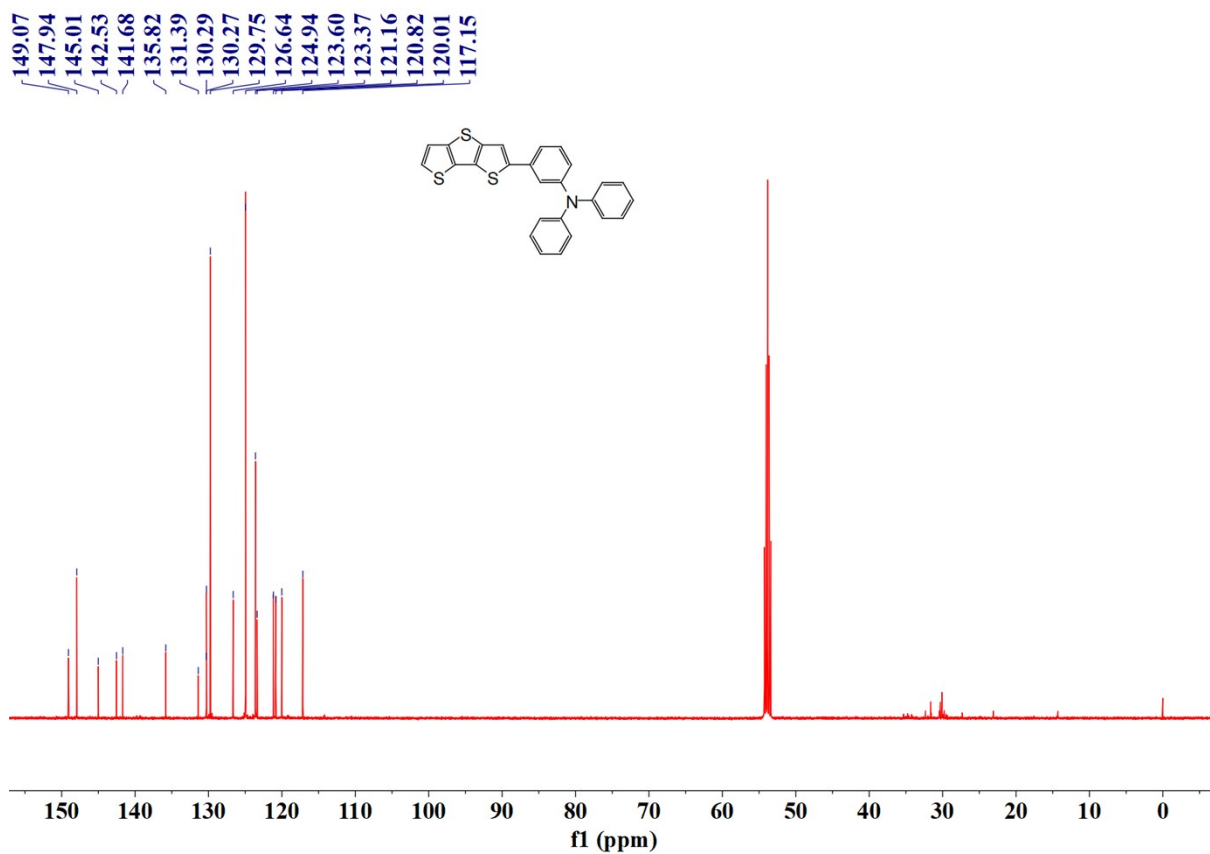

**Figure S4.**  $^{13}\text{C}$  NMR spectrum of *m*-TPA-DTT measured in  $\text{CD}_2\text{Cl}_2$ .

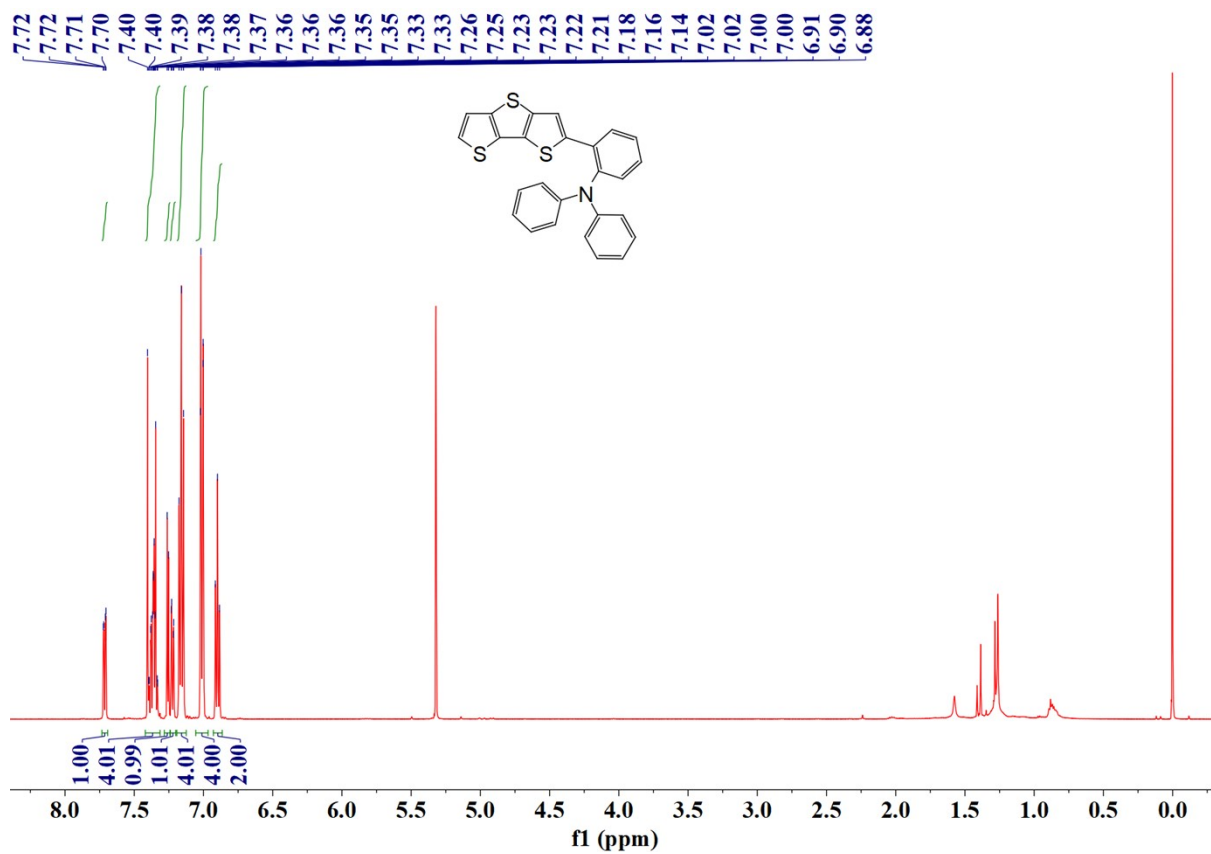

**Figure S5.** <sup>1</sup>H NMR spectrum of *o*-TPA-DTT measured in CD<sub>2</sub>Cl<sub>2</sub>.

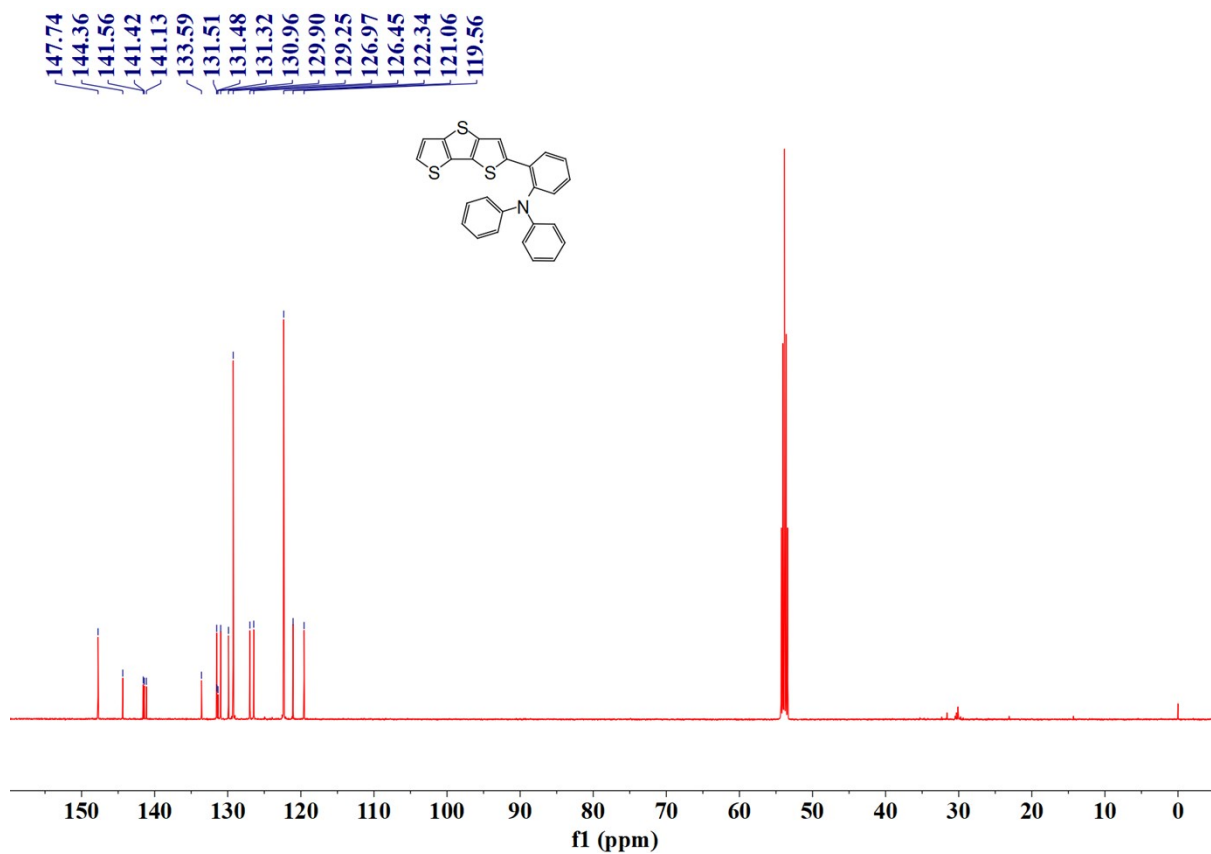

**Figure S6.** <sup>13</sup>C NMR spectrum of *o*-TPA-DTT measured in CD<sub>2</sub>Cl<sub>2</sub>.

### 3. Device Fabrication

The charge carrier injecting and transporting material and the host materials for fabrication of OLEDs were obtained commercially and used as received without further purification. ITO coated glass was used as the substrate and the sheet resistance was  $15 \Omega \text{ square}^{-1}$ . The ITO glass substrates were cleaned with isopropyl alcohol, acetone, toluene and deionized water, dried in an oven at  $120 \text{ }^\circ\text{C}$ , treated with UV-zone for 20 min, and finally transferred to a vacuum deposition system with a base pressure lower than  $5 \times 10^{-6}$  mbar for organic and metal deposition. The devices were fabricated by evaporating organic layers with an evaporation rate of  $0.5\text{-}1 \text{ \AA s}^{-1}$ . The cathode LiF (1 nm) was deposited at a rate of  $0.1 \text{ \AA s}^{-1}$  and then the capping Al metal layer (120 nm) was deposited at a rate of  $4.0 \text{ \AA s}^{-1}$ . A mask with an array of  $2 \text{ cm} \times 2 \text{ cm}$  openings was used to define the cathode. The electroluminescent (EL) characteristics were measured using a Keithley 2400 programmable electrometer and a PR-650 Spectroscan spectrometer under ambient condition at room temperature. The transient EL decay was tested by an Agilent 8114A pulse generator (100 V/2 A) to generate rectangular pulse voltages. The pulse repetition rate was 1 kHz with the width of 100  $\mu\text{s}$ . The EL signal was detected using a lens coupled with the optical fiber connected to a Hamamatsu photomultiplier (H10721-20) with time resolution of 0.57 ns. The photomultiplier was connected to one of the channels of a digital oscilloscope (Tektronix DPO7104, sampling rate:  $5 \text{ GS s}^{-1}$ ; resolution: 100  $\mu\text{V}$ ) with 50  $\Omega$  input resistance.<sup>3, 4</sup>

#### 4. Supporting Figures and Table

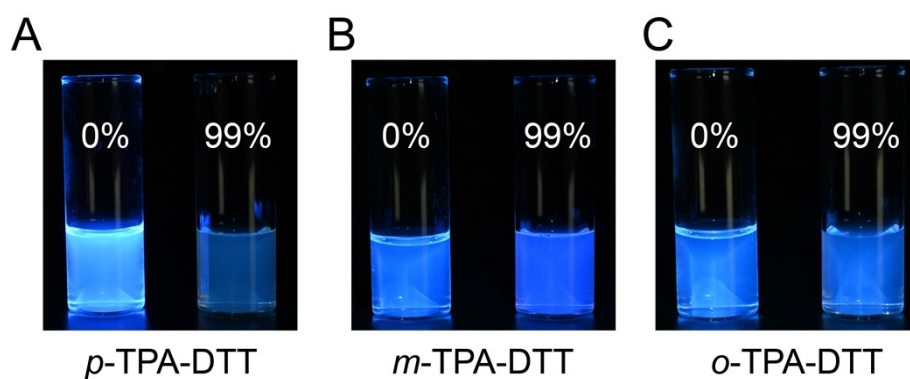

**Figure S7.** The photos of TPA-DTTs in THF and 99% water respectively under 365 nm UV lamp.

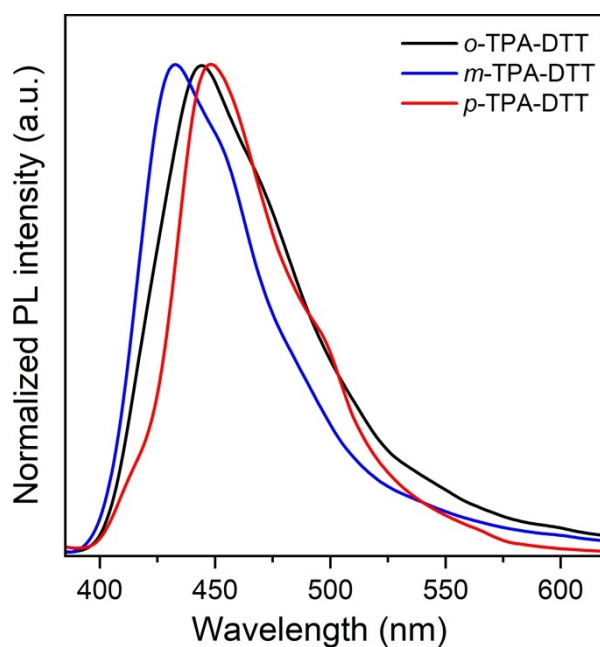

**Figure S8.** The normalized emission spectra of TPA-DTTs in the thin-film state.

**Table S1.** Crystallographic and structural refinement data of TPA-DTTs.

| Compound                                      | <i>o</i> -TPA-DTT                                                   | <i>m</i> -TPA-DTT                                                   | <i>p</i> -TPA-DTT                                                   |
|-----------------------------------------------|---------------------------------------------------------------------|---------------------------------------------------------------------|---------------------------------------------------------------------|
| CCDC                                          | 2494340                                                             | 2494341                                                             | 2494342                                                             |
| Empirical formula                             | C <sub>26</sub> H <sub>17</sub> NS <sub>3</sub>                     | C <sub>26</sub> H <sub>17</sub> NS <sub>3</sub>                     | C <sub>26</sub> H <sub>17</sub> NS <sub>3</sub>                     |
| Formula weight                                | 439.59                                                              | 439.59                                                              | 439.59                                                              |
| Temperature/K                                 | 186.00                                                              | 150.0                                                               | 150.00                                                              |
| Crystal system                                | triclinic                                                           | monoclinic                                                          | triclinic                                                           |
| Space group                                   | P-1                                                                 | P2 <sub>1</sub> /c                                                  | P-1                                                                 |
| a/Å                                           | 9.4291(12)                                                          | 12.9360(15)                                                         | 7.2472(6)                                                           |
| b/Å                                           | 10.4501(12)                                                         | 8.3970(10)                                                          | 7.4820(6)                                                           |
| c/Å                                           | 11.0872(14)                                                         | 20.078(2)                                                           | 19.3053(17)                                                         |
| α/°                                           | 81.909(7)                                                           | 90                                                                  | 98.455(4)                                                           |
| β/°                                           | 80.705(7)                                                           | 107.440(4)                                                          | 90.634(4)                                                           |
| γ/°                                           | 75.383(7)                                                           | 90                                                                  | 98.010(4)                                                           |
| Volume/Å <sup>3</sup>                         | 1037.5(2)                                                           | 2080.6(4)                                                           | 1024.79(15)                                                         |
| Z                                             | 2                                                                   | 4                                                                   | 2                                                                   |
| ρ <sub>calc</sub> g/cm <sup>3</sup>           | 1.407                                                               | 1.403                                                               | 1.425                                                               |
| μ/mm <sup>-1</sup>                            | 3.360                                                               | 3.351                                                               | 3.402                                                               |
| F(000)                                        | 456.0                                                               | 912.0                                                               | 456.0                                                               |
| Crystal size/mm <sup>3</sup>                  | 0.38 × 0.35 × 0.26                                                  | 0.057 × 0.046 ×<br>0.025                                            | 0.058 × 0.046 ×<br>0.032                                            |
| Radiation                                     | Cu-Kα (λ =<br>1.54178)                                              | Cu-Kα (λ =<br>1.54178)                                              | Cu-Kα (λ =<br>1.54178)                                              |
| 2θ range for data<br>collection/°             | 8.792 to 137.526                                                    | 14.026 to 136.562                                                   | 9.268 to 133.17                                                     |
| Index ranges                                  | -11 ≤ h ≤ 11, -12 ≤<br>k ≤ 12, -13 ≤ l ≤ 13                         | -15 ≤ h ≤ 15, -9 ≤<br>k ≤ 10, -24 ≤ l ≤<br>24                       | -8 ≤ h ≤ 8, -7 ≤ k ≤<br>8, -22 ≤ l ≤ 22                             |
| Reflections collected                         | 21875                                                               | 37240                                                               | 11505                                                               |
| Independent reflections                       | 3686 [R <sub>int</sub> =<br>0.1163, R <sub>sigma</sub> =<br>0.0818] | 3758 [R <sub>int</sub> =<br>0.0456, R <sub>sigma</sub> =<br>0.0229] | 3506 [R <sub>int</sub> =<br>0.0509, R <sub>sigma</sub> =<br>0.0466] |
| Data/restraints/parameters                    | 3686/0/271                                                          | 3758/0/271                                                          | 3506/0/271                                                          |
| Goodness-of-fit on F <sup>2</sup>             | 1.065                                                               | 1.041                                                               | 1.074                                                               |
| Final R indexes<br>[I ≥ 2σ (I)]               | R <sub>1</sub> = 0.0816, wR <sub>2</sub> =<br>0.2285                | R <sub>1</sub> = 0.0296, wR <sub>2</sub> =<br>= 0.0775              | R <sub>1</sub> = 0.0337, wR <sub>2</sub> =<br>0.0913                |
| Final R indexes [all data]                    | R <sub>1</sub> = 0.1025, wR <sub>2</sub> =<br>0.2499                | R <sub>1</sub> = 0.0302, wR <sub>2</sub> =<br>= 0.0779              | R <sub>1</sub> = 0.0373, wR <sub>2</sub> =<br>0.0941                |
| Largest diff. peak/hole /<br>eÅ <sup>-3</sup> | 0.95/-0.56                                                          | 0.28/-0.25                                                          | 0.30/-0.27                                                          |

## 5. References

- 1 H. Liu, Z. Zhuang, Y. Hou, Y. Zhu, R. Xu, B. Chen, R. Hu and Z. Zhao, *Phy. Chem. Chem. Phys.*, 2025, **27**, 14733-14738.
- 2 J. W. Meringdal and D. Menche, *Chem. Soc. Rev.*, 2025, **54**, 5746-5765.
- 3 B. Chen, B. Liu, J. Zeng, H. Nie, Y. Xiong, J. Zou, H. Ning, Z. Wang, Z. Zhao and B. Z. Tang, *Adv. Fun. Mater.*, 2018, **28**, 1803369.
- 4 F. Liu, H. Liu, X. Tang, S. Ren, X. He, J. Li, C. Du, Z. Feng and P. Lu, *Nano Energy*, 2020, **68**, 104325.
